# Supplementary material for: Increased CD14+HLA-DR-/low myeloid-derived suppressor cells correlate with extrathoracic metastasis and poor response to chemotherapy in non-small cell lung cancer patients
Source: Springer Nature journal article supplement (doi:10.1007/s00262-013-1450-6), 2013-06-12
Supplement: 262_2013_1450_MOESM1_ESM.pdf [file 262_2013_1450_MOESM1_ESM.pdf]

## **Cancer Immunology, Immunotherapy**

### **Increased CD14<sup>+</sup>HLA-DR<sup>-/low</sup> myeloid-derived suppressor cells correlate with extrathoracic metastasis and poor response to chemotherapy in non-small cell lung cancer patients**

Ang Huang<sup>1,3</sup> · Bo Zhang<sup>2</sup> · Bo Wang<sup>1</sup> · Fan Zhang<sup>1</sup> · Ke-Xing Fan<sup>2</sup> · Ya-Jun Guo<sup>1,2</sup>

<sup>1</sup>Cancer Center, Chinese PLA General Hospital, Beijing 100853, People's Republic of China

<sup>2</sup>International Joint Cancer Institute, The Second Military Medical University, Shanghai 200433, People's Republic of China

<sup>3</sup>Department of Infectious Diseases, Beijing 302 Hospital, Beijing 100039, People's Republic of China

A. Huang and B. Zhang contributed equally to this work as first authors.

**Corresponding author:** Ya-Jun Guo, Ph.D., M.D., or Ke-Xing Fan, Ph.D., M.D., Chinese PLA General Hospital Cancer Center and International Joint Cancer Institute, The Second Military Medical University, 800 Xiang Yin Road, New Building West 10-11th Floor, Shanghai 200433, People's Republic of China. E-mail address: yjguo@smmu.edu.cn or kexingfan@gmail.com. Phone: +86-21-81870801; Fax: +86-21-81870801.

Supplementary Table 1. The clinical data for the enrolled subjects with different responses to chemotherapy

|                           | <b>All cases</b> | <b>PR</b>   | <b>SD</b>   | <b>PD</b>    |
|---------------------------|------------------|-------------|-------------|--------------|
| Gender(male/female)       | 27/19            | 10/7        | 11/6        | 6/6          |
| Age(years)                | 52.19± 8.87      | 54.89± 7.98 | 49.11± 8.28 | 52.66± 10.15 |
| <b>Histological type</b>  |                  |             |             |              |
| Adenocarcinoma            | 43               | 16          | 15          | 12           |
| squamous cell carcinoma   | 3                | 1           | 2           | 0            |
| <b>AJCC stage</b>         |                  |             |             |              |
| III(unresectable)         | 7                | 4           | 3           | 0            |
| IV(M1a)                   | 22               | 8           | 8           | 6            |
| IV(M1b)                   | 17               | 5           | 6           | 6            |
| <b>1st line treatment</b> |                  |             |             |              |
| Docetaxel + Cisplatin     | 21               | 6           | 7           | 8            |
| Pemetrexed + Cisplatin    | 22               | 10          | 8           | 4            |
| Gemcitabine + Cisplatin   | 3                | 1           | 2           | 0            |

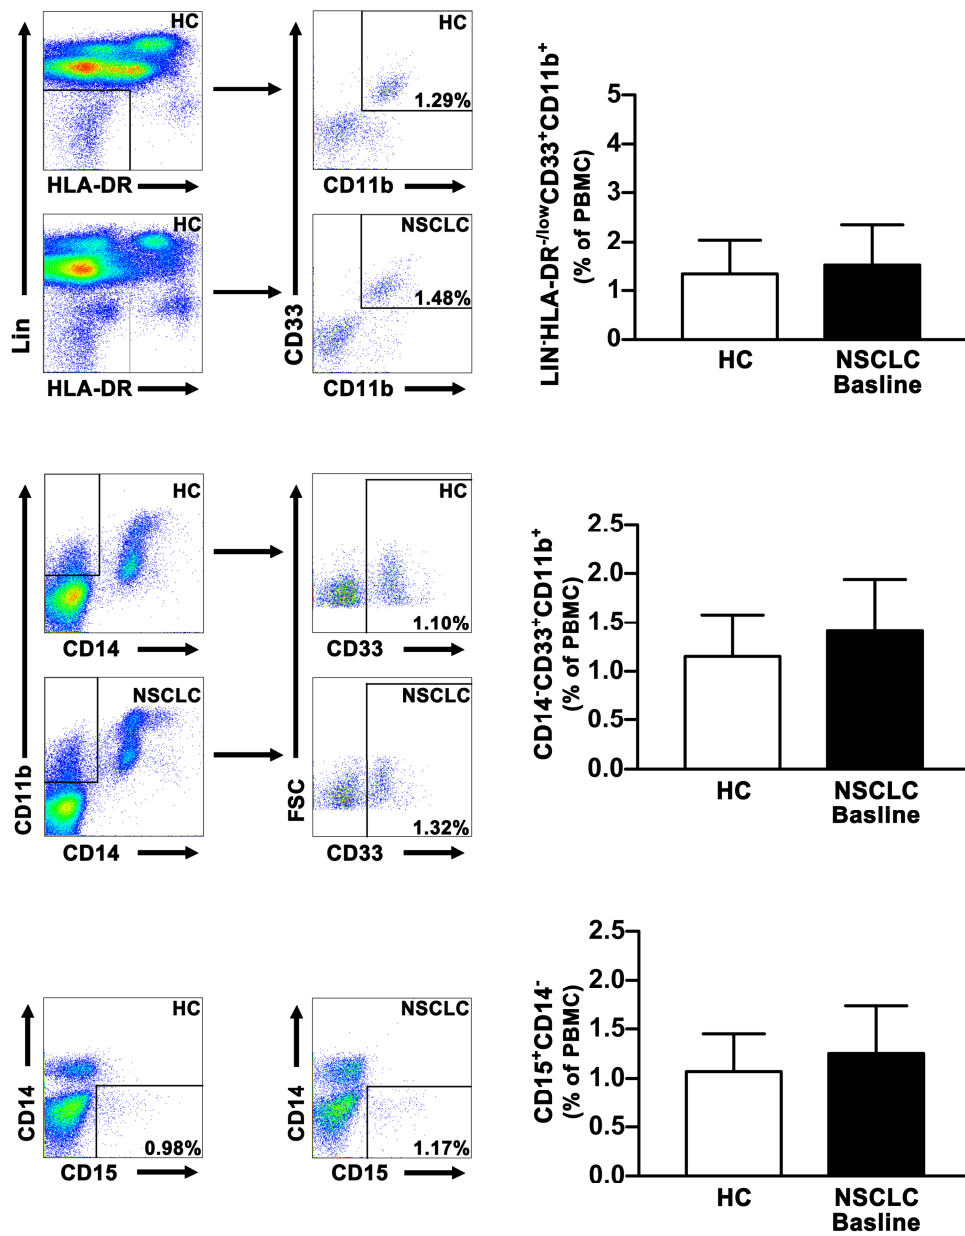

Supplementary Fig. 1 Representative dot plots and frequencies of Lin<sup>-</sup>HLA-DR<sup>-</sup>CD33<sup>+</sup>CD11b<sup>+</sup>, CD11b<sup>+</sup>CD14<sup>-</sup>CD33<sup>+</sup> and CD15<sup>+</sup>CD14<sup>-</sup> cells in NSCLC (n=28) as compared to HC (n=15) PBMC. Bars indicate mean  $\pm$  SD.

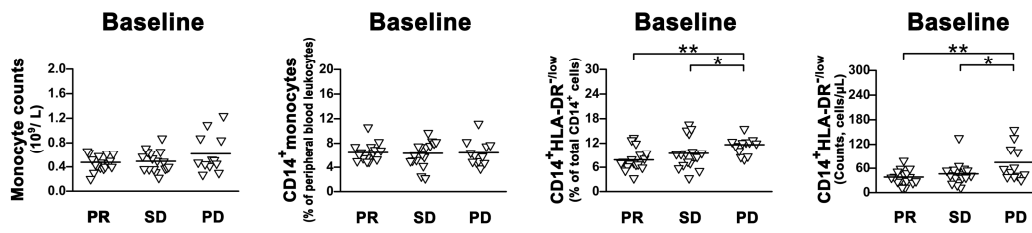

Supplementary Fig. 2 Baseline frequency and absolute number of CD14<sup>+</sup>HLA-DR<sup>-/low</sup> cells in NSCLC patients were associated with treatment response to chemotherapy. Each dot represents one individual.

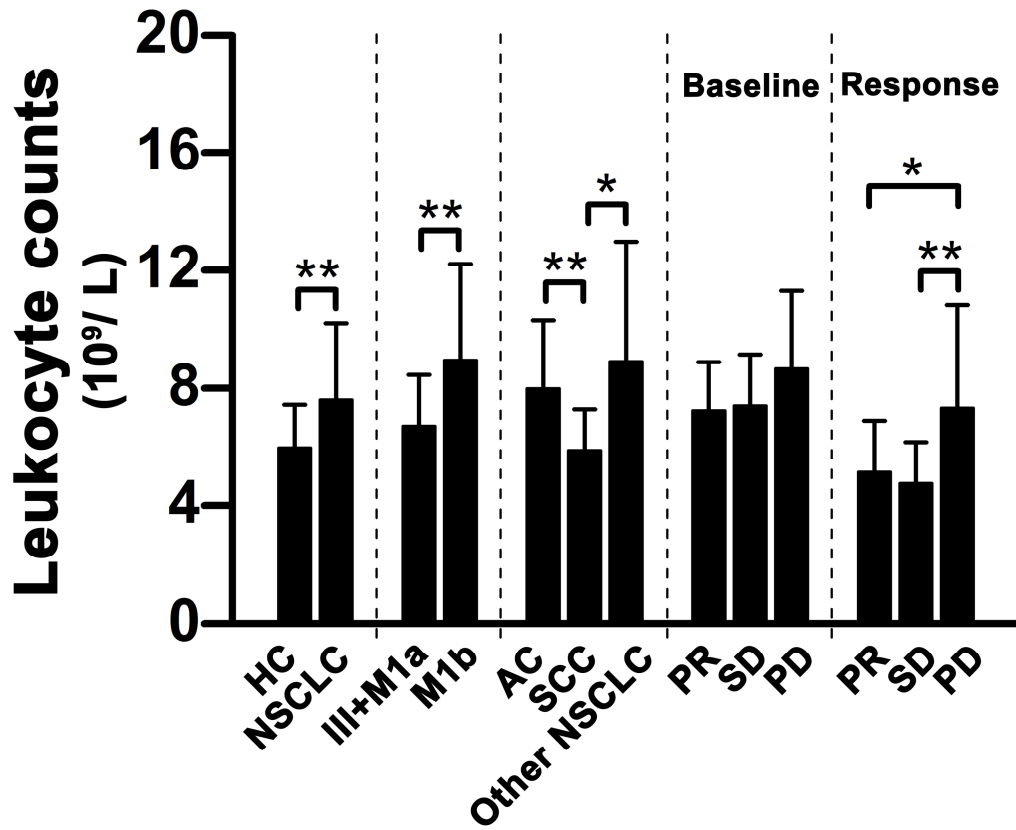

Supplementary Fig. 3 Absolute numbers of peripheral blood leukocytes in different groups. Bars indicate mean  $\pm$  SD.
